# Supplementary material
Source: Springer Nature journal article supplement (https://www.springermedizin.de/resource/supplementary/12904_2013_218_MOESM1_ESM.pdf/9517790)

Clinical chart  
review

Identification of GP

Interview with GP

Identification of  
Caregiver

Interview with  
Caregiver

Interviewer's  
assessment of  
caregiver distress

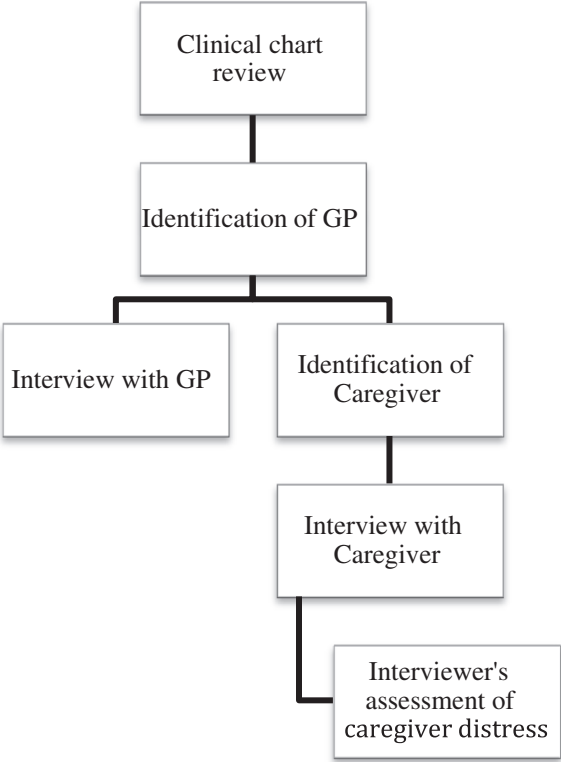

Supplement: MOESM1 [file 9517790]
